# Supplementary material
Source: publisher site journal article supplement (https://www.dovepress.com/article/300747)
Supplement: Supplementary file 1 [file get_supplementary_file.php]

**Supplementary Materials**

**Factors associated with the expression of ACE2 in human lung tissue: Pathological evidence from patients with normal FEV1 and FEV1/FVC**

**Table S1. *P* values for the Spearman correlation coefficient matrix and Spearman rank correlation tests for ACE2 and clinical features.**

n = 64. ACE2 was positively correlated with weight (*r* = 0.43, *P*＜0.001), BMI (*r* = 0.38, *P* = 0.002), height (*r* = 0.27, *P* = 0.034), age (*r* = 0.26, *P* = 0.040) and macrophages in lung (*r* = 0.27, *P =* 0.030), and was negatively correlated with peripheral eosinophils (*r* = -0.30, *P* = 0.017). ACE2 was not correlated with FENO/CANO, spirometric variables, lymphocytes and neutrophils (peripheral or in lung tissue), eosinophils in lung, platelets, or the percentages of pneumonectasis (*P*＞0.05, for all).

PLT: platelets; LYM: lymphocytes; NEU: neutrophils; EOS: eosinophil; MMEF: percentage of actual value to predicted value of maximum mid-expiratory flow; MEF50: percentage of actual value to predicted value of forced expiratory flow at 50% of forced vital capacity; FEV1: forced expiratory volume in 1 second; FVC: forced vital capacity; BMI: body mass index; CANO: alveolar concentration of nitric oxide; FENO: fractional exhaled nitric oxide; MAC: macrophages; ACE2: angiotensin converting enzyme 2; SS: surgical side.

|  | Lung | | | | FENO | CANO | Age | Height | Weight | BMI | FEV1/FVC | FEV1% | MEF50 | MMEF | Peripheral | | | | | | | pneumonectasis-SS |
| --- | --- | --- | --- | --- | --- | --- | --- | --- | --- | --- | --- | --- | --- | --- | --- | --- | --- | --- | --- | --- | --- | --- |
| MAC | LYM | NEU | EOS | EOS | EOS% | NEU | NEU% | LYM | LYM% | PLT |
| Peripheral PLT |  |  |  |  |  |  |  |  |  |  |  |  |  |  |  |  |  |  |  |  |  | 0.824 |
| Peripheral LYM% |  |  |  |  |  |  |  |  |  |  |  |  |  |  |  |  |  |  |  |  | 0.443 | 0.713 |
| Peripheral LYM |  |  |  |  |  |  |  |  |  |  |  |  |  |  |  |  |  |  |  | *** | 0.010 | 0.922 |
| Peripheral NEU% |  |  |  |  |  |  |  |  |  |  |  |  |  |  |  |  |  |  | *** | *** | 0.606 | 0.742 |
| Peripheral NEU |  |  |  |  |  |  |  |  |  |  |  |  |  |  |  |  |  | *** | 0.109 | *** | 0.119 | 0.450 |
| Peripheral EOS% |  |  |  |  |  |  |  |  |  |  |  |  |  |  |  |  | 0.162 | 0.827 | 0.209 | 0.336 | 0.913 | 0.774 |
| Peripheral EOS |  |  |  |  |  |  |  |  |  |  |  |  |  |  |  | *** | 0.311 | 0.646 | 0.725 | 0.188 | 0.121 | 0.914 |
| MMEF |  |  |  |  |  |  |  |  |  |  |  |  |  |  | 0.250 | 0.152 | 0.405 | 0.633 | 0.510 | 0.821 | 0.406 | 0.620 |
| MEF50 |  |  |  |  |  |  |  |  |  |  |  |  |  | *** | 0.190 | 0.088 | 0.527 | 0.740 | 0.490 | 0.666 | 0.395 | 0.667 |
| FEV1% |  |  |  |  |  |  |  |  |  |  |  |  | *** | *** | 0.109 | 0.126 | 0.680 | 0.684 | 0.963 | 0.584 | 0.471 | 0.589 |
| FEV1/FVC |  |  |  |  |  |  |  |  |  |  |  | *** | *** | *** | 0.429 | 0.291 | 0.603 | 0.932 | 0.324 | 0.380 | 0.081 | 0.909 |
| BMI |  |  |  |  |  |  |  |  |  |  | 0.150 | 0.460 | 0.678 | 0.654 | 0.246 | 0.208 | 0.436 | 0.954 | 0.549 | 0.928 | 0.352 | 0.413 |
| Weight |  |  |  |  |  |  |  |  |  | *** | 0.082 | 0.746 | 0.770 | 0.823 | 0.721 | 0.337 | 0.240 | 0.941 | 0.316 | 0.764 | 0.724 | 0.781 |
| Height |  |  |  |  |  |  |  |  | *** | 0.858 | 0.383 | 0.486 | 0.448 | 0.325 | 0.629 | 0.714 | 0.042 | 0.339 | 0.703 | 0.170 | 0.035 | 0.050 |
| Age |  |  |  |  |  |  |  | 0.798 | 0.350 | 0.084 | 0.064 | 0.876 | 0.081 | 0.263 | 0.303 | 0.206 | 0.320 | 0.246 | 0.217 | 0.058 | 0.359 | 0.813 |
| CANO |  |  |  |  |  |  | 0.411 | 0.065 | 0.074 | 0.295 | 0.001 | 0.004 | *** | 0.001 | 0.719 | 0.475 | 0.183 | 0.062 | 0.316 | 0.017 | 0.020 | 0.569 |
| FENO |  |  |  |  |  | 0.089 | 0.910 | 0.399 | 0.161 | 0.311 | 0.421 | 0.002 | 0.208 | 0.243 | 0.255 | 0.270 | 0.491 | 0.806 | 0.987 | 0.311 | 0.791 | 0.758 |
| EOS in lung |  |  |  |  | 0.264 | 0.248 | 0.028 | 0.144 | 0.288 | 0.639 | 0.770 | 0.015 | 0.060 | 0.031 | 0.014 | 0.009 | 0.569 | 0.430 | 0.741 | 0.753 | 0.742 | 0.804 |
| NEU in lung |  |  |  | *** | 0.022 | 0.281 | 0.604 | 0.214 | 0.937 | 0.405 | 0.680 | 0.103 | 0.162 | 0.170 | 0.883 | 0.574 | 0.957 | 0.265 | 0.096 | 0.185 | 0.847 | 0.655 |
| LYM in lung |  |  | 0.032 | 0.088 | 0.425 | 0.844 | 0.843 | 0.514 | 0.903 | 0.586 | 0.458 | 0.940 | 0.906 | 0.565 | 0.333 | 0.123 | 0.216 | 0.991 | 0.539 | 0.841 | 0.794 | 0.786 |
| MAC in lung |  | 0.139 | *** | 0.005 | 0.079 | 0.311 | 0.723 | 0.511 | 0.507 | 0.560 | 0.049 | 0.017 | 0.024 | 0.017 | 0.536 | 0.563 | 0.909 | 0.819 | 0.717 | 0.921 | 0.373 | 0.931 |
| ACE2 | 0.030 | 0.648 | 0.319 | 0.808 | 0.874 | 0.744 | 0.040 | 0.034 | *** | 0.002 | 0.661 | 0.455 | 0.634 | 0.504 | 0.074 | 0.017 | 0.693 | 0.669 | 0.737 | 0.696 | 0.543 | 0.747 |

***: < 0.001

PLT: platelets; LYM: lymphocytes; NEU: neutrophils; EOS: eosinophil; MMEF: percentage of actual value to predicted value of maximum mid-expiratory flow; MEF50: percentage of actual value to predicted value of forced expiratory flow at 50% of forced vital capacity; FEV1: forced expiratory volume in 1 second; FVC: forced vital capacity; BMI: body mass index; CANO: alveolar concentration of nitric oxide; FENO: fractional exhaled nitric oxide; MAC: macrophages; ACE2, angiotensin converting enzyme 2; SS: surgical side.

**Table S2. *P* values of the Spearman correlation coefficient matrix for** **correlation of ACE2 and age with pro-inflammation cytokines in the biopsied tissues.**

n = 64. No statistically significant correlation was found between ACE2 and any of the pro-inflammation cytokines analyzed in lung tissue (IL-6R, TNF-α, IL-17A, IL-13, IL-10, IL-8, IL-6, IL-4, IL-1β, NF-κB: *P*＞0.05, for all). Age was found positively correlated with IL-6R and IL-13 in lung tissue. (*r* =0.26, *P* ＜.05 for both).

ACE2, angiotensin converting enzyme 2; IL-6R, interleukin-6 receptor; TNF-α, tumor necrosis factor-α, IL-17A, interleukin-17A; IL-13, interleukin-13; IL-10, interleukin-10; IL-8, interleukin-8; IL-6, interleukin-6; IL-4, interleukin-4; IL-1β, interleukin-1β; NF-κB, nuclear factor-κB.

|  | Age | ACE2 | IL-6R | NFκB | IL-1β | IL-4 | IL-5 | IL-6 | IL-8 | IL-10 | IL-13 | IL-17A | TNF-α | TGF-β1 |
| --- | --- | --- | --- | --- | --- | --- | --- | --- | --- | --- | --- | --- | --- | --- |
| TNF-α |  |  |  |  |  |  |  |  |  |  |  |  |  | 0.079 |
| IL-17A |  |  |  |  |  |  |  |  |  |  |  |  | *** | 0.478 |
| IL-13 |  |  |  |  |  |  |  |  |  |  |  | *** | *** | 0.017 |
| IL-10 |  |  |  |  |  |  |  |  |  |  | *** | *** | *** | 0.010 |
| IL-8 |  |  |  |  |  |  |  |  |  | 0.334 | 0.027 | 0.090 | 0.008 | 0.725 |
| IL-6 |  |  |  |  |  |  |  |  | *** | 0.670 | 0.004 | 0.086 | 0.023 | 0.128 |
| IL-5 |  |  |  |  |  |  |  | 0.059 | 0.035 | *** | *** | *** | *** | 0.203 |
| IL-4 |  |  |  |  |  |  | *** | 0.016 | 0.013 | *** | *** | *** | *** | 0.963 |
| IL-1β |  |  |  |  |  | *** | *** | 0.001 | *** | *** | *** | *** | *** | 0.090 |
| NF-κB |  |  |  |  | 0.971 | 0.370 | 0.825 | 0.434 | 0.758 | 0.849 | 0.738 | 0.955 | 0.723 | 0.912 |
| IL-6R |  |  |  | 0.693 | 0.393 | 0.788 | 0.927 | 0.018 | 0.067 | 0.914 | 0.648 | 0.525 | 0.514 | 0.253 |
| ACE2 |  |  | 0.885 | 0.262 | 0.399 | 0.326 | 0.846 | 0.821 | 0.284 | 0.439 | 0.368 | 0.529 | 0.852 | 0.771 |
| Age |  | 0.040 | 0.035 | 0.102 | 0.198 | 0.970 | 0.116 | 0.445 | 0.063 | 0.080 | 0.040 | 0.265 | 0.124 | 0.133 |
| BMI | 0.084 | 0.002 | 0.172 | 0.131 | 0.928 | 0.709 | 0.952 | 0.347 | 0.941 | 0.399 | 0.432 | 0.383 | 0.509 | 0.930 |

***: < 0.001

TNF-α, tumor necrosis factor-α; IL: interleukin; NF-κB, nuclear factor kappa-B; ACE2, angiotensin converting enzyme 2; TGF-β1, transforming growth factor-β1。
